# Supplementary material for: Stochastic colonization of hosts with a finite lifespan can drive individual host microbes out of equilibrium
Source: PLOS journal article supplement (doi:10.1371/journal.pcbi.1008392), 2020-11-02
Supplement: S1 (10.1371/journal.pcbi.1008392.s001) [file journal.pcbi.1008392.s001]

# Stochastic colonization of hosts with a finite lifespan can drive individual host microbes out of equilibrium

Román Zapién-Campos<sup>1</sup>, Michael Sieber<sup>1</sup>, Arne Traulsen<sup>1,\*</sup>

<sup>1</sup> Max Planck Institute for Evolutionary Biology, August-Thienemann-Str. 2, 24306 Plön, Germany

\* traulsen@evolbio.mpg.de

## Supporting Information

### S1 Appendix

#### Derivation of the Fokker-Planck approximation with resetting

Define a Markov process in the discrete state space  $\{0, 1, \dots, N\}$ , where  $N$  is the maximum capacity for microbes within a single host. Let  $n_i$  be the number of individuals of the  $i$ -th microbial taxon for  $i = \{1, \dots, M\}$  and  $n_0$  the amount of unoccupied space. The probability of being in state  $n_i$  at time  $t + 1$  is given by the sum of the probabilities to go in, out and remain in  $n_i$  at time  $t$ ,

$$\Phi_i[n_i, t + 1] = \sum_{o_i=0}^N P_i[o_i \rightarrow n_i] \Phi_i[o_i, t],$$

where  $\Phi_i[o_i, t]$  is the probability of being in state  $o_i$  at time  $t$ , and  $P_i[o_i \rightarrow n_i]$  is the probability of transitioning from state  $o_i$  to  $n_i$ . Taking out the probability of remaining at  $n_i$  we get

$$\Phi_i[n_i, t + 1] = P_i[n_i \rightarrow n_i] \Phi_i[n_i, t] + \sum_{o_i \neq n_i} P_i[o_i \rightarrow n_i] \Phi_i[o_i, t]$$

However  $P_i[n_i \rightarrow n_i] = 1 - \sum_{o_i \neq n_i} P_i[n_i \rightarrow o_i]$ . Therefore

$$\Phi_i[n_i, t + 1] - \Phi_i[n_i, t] = - \sum_{o_i \neq n_i} P_i[n_i \rightarrow o_i] \Phi_i[n_i, t] + \sum_{o_i \neq n_i} P_i[o_i \rightarrow n_i] \Phi_i[o_i, t]$$

Dividing by  $\Delta t$  and taking the continuous time limit, we find the time continuous master equation

$$\frac{\partial \Phi_i[n_i, t]}{\partial t} = - \sum_{o_i \neq n_i} T_i[n_i \rightarrow o_i] \Phi_i[n_i, t] + \sum_{o_i \neq n_i} T_i[o_i \rightarrow n_i] \Phi_i[o_i, t],$$

where  $T_i[n_i \rightarrow o_i]$  and  $T_i[o_i \rightarrow n_i]$  are transition rates. This equation contains transitions to and from neighbouring states of  $n_i$ , i.e.  $n_i - 1$  and  $n_i + 1$ , but also to and from non-neighbouring states due to resetting events.

The next derivation steps focus on approximating the neighbouring transitions locally around  $n_i$ . However, because the resetting events are non-neighbouring transitions, we have to treat them separately. To do this, we assume that each

$T_i[n_i \rightarrow o_i]$  and  $T_i[o_i \rightarrow n_i]$  can be linearly separated in contributions due to resetting and non-resetting events.

Define  $R_i$  as the only state towards which the resetting occurs, so the master equation for this state is

$$\frac{\partial \Phi_i[R_i, t]}{\partial t} = - \sum_{o_i \neq R_i} T_i[R_i \rightarrow o_i] \Phi_i[R_i, t] + \sum_{o_i \neq R_i} T_i^*[o_i \rightarrow R_i] \Phi_i[o_i, t] + \sum_{o_i \neq R_i} \tau \Phi_i[o_i, t],$$

where  $T_i^*[o_i \rightarrow R_i]$  are transition rates from neighbouring  $o_i$  to  $R_i$ , and  $\tau$  is the transition rate from non-neighbouring  $o_i$  to  $R_i$  (which we assume to be independent of  $o_i$ ). We can rewrite this as

$$\frac{\partial \Phi_i[R_i, t]}{\partial t} = - \sum_{o_i \neq R_i} T_i[R_i \rightarrow o_i] \Phi_i[R_i, t] + \sum_{o_i \neq R_i} T_i^*[o_i \rightarrow R_i] \Phi_i[o_i, t] + \tau(1 - \Phi_i[R_i, t])$$

For any other state  $n_i^* := n_i \neq R_i$ , the master equation is

$$\frac{\partial \Phi_i[n_i^*, t]}{\partial t} = - \sum_{o_i \neq n_i^*} T_i^*[n_i^* \rightarrow o_i] \Phi_i[n_i^*, t] - \tau \Phi_i[n_i^*, t] + \sum_{o_i \neq n_i^*} T_i[o_i \rightarrow n_i^*] \Phi_i[o_i, t],$$

where  $T_i^*[n_i^* \rightarrow o_i]$  are transition rates from  $n_i^*$  to neighbouring  $o_i$ . We can combine both master equations in the following way

$$\frac{\partial \Phi_i[n_i, t]}{\partial t} = - \sum_{o_i \neq n_i} T_i^*[n_i \rightarrow o_i] \Phi_i[n_i, t] + \sum_{o_i \neq n_i} T_i^*[o_i \rightarrow n_i] \Phi_i[o_i, t] + \tau(\delta_{n_i, R_i} - \Phi_i[n_i, t]),$$

where  $\delta_{n_i, R_i}$  is the Kronecker delta (1 for  $n_i = R_i$  and 0 in all other cases), and  $\tau \Phi_i[n_i, t]$  and  $\tau \delta_{n_i, R_i}$  are the non-neighbouring outflux and influx, respectively.

Now we can approximate the neighbouring transitions contained in the sums. We define  $x_i = n_i/N$  and  $r_i = R_i/N$ , which are approximately continuous in the large  $N$  limit. With this the sums are replaced by integrals

$$\begin{aligned} \frac{\partial \Phi_i[x_i, t]}{\partial t} = & - \int T_i^*[x_i \rightarrow x_i + \Delta x_i] \Phi_i[x_i, t] d\Delta x_i + \int T_i^*[x_i + \Delta x_i \rightarrow x_i] \Phi_i[x_i + \Delta x_i, t] d\Delta x_i \\ & + \tau(\delta_{x_i, r_i} - \Phi_i[x_i, t]), \end{aligned}$$

where  $\delta_{x_i, r_i}$  is 1 for  $x_i = r_i$  and 0 otherwise. We focus on the interval  $\Delta x_i$  around  $x_i$  to obtain the Taylor expansion of the influx,  $\int T_i^*[x_i + \Delta x_i \rightarrow x_i] \Phi_i[x_i + \Delta x_i, t] d\Delta x_i$

$$\begin{aligned} = & \int T_i^*[x_i \rightarrow x_i - \Delta x_i] \Phi_i[x_i, t] d\Delta x_i - \int \Delta x_i \frac{\partial}{\partial x_i} (T_i^*[x_i \rightarrow x_i - \Delta x_i] \Phi_i[x_i, t]) d\Delta x_i + \\ & \int \frac{(\Delta x_i)^2}{2} \frac{\partial^2}{\partial x_i^2} (T_i^*[x_i \rightarrow x_i - \Delta x_i] \Phi_i[x_i, t]) d\Delta x_i + \dots \end{aligned}$$

Realizing that the magnitude of the zeroth order term equals the outflux, truncating the expansion at the second order and putting terms together, we find

$$\begin{aligned} \frac{\partial \Phi_i[x_i, t]}{\partial t} = & - \frac{\partial}{\partial x_i} \left( \Phi_i[x_i, t] \int \Delta x_i T_i^*[x_i \rightarrow x_i - \Delta x_i] d\Delta x_i \right) \\ & + \frac{1}{2} \frac{\partial^2}{\partial x_i^2} \left( \Phi_i[x_i, t] \int (\Delta x_i)^2 T_i^*[x_i \rightarrow x_i - \Delta x_i] d\Delta x_i \right) + \tau(\delta_{x_i, r_i} - \Phi_i[x_i, t]) \end{aligned}$$

Which simplifies to

$$\frac{\partial}{\partial t} \Phi_i[x_i, t] = \frac{\partial}{\partial x_i} \left( -a_i[x_i] \Phi_i[x_i, t] + \frac{1}{2} \frac{\partial}{\partial x_i} (b_i^2[x_i] \Phi_i[x_i, t]) \right) + \tau (\delta_{x_i, r_i} - \Phi_i[x_i, t]), \quad (S1)$$

where  $a_i[x_i]$  and  $b_i^2[x_i]$  are the expected change and squared-change of  $x_i$ , respectively. These quantities are derived in the main text based on the process of death, birth and immigration of microbes. Although, the change of  $x_i$  depends on all  $k \neq i$ . Derived from our assumptions,  $a_i[x_i]$  and  $b_i^2[x_i]$  contain all the information of a host microbiome from the  $j$ -th microbial taxon or unoccupied space ( $i = 0$ ) perspective.

Importantly, host death, expressed by  $\tau(\delta_{x_i, r_i} - \Phi_i[x_i, t])$ , has opposite effects on microbes and unoccupied space. For a microbial taxon the frequency resets to zero,  $r_i = 0$ , while for unoccupied space it resets to one,  $r_0 = 1$ . Eq (S1) is the same as Eq (2) in the main text.

A numerical solution of the stationary model, Eq (5) in the main text, can be found using the boundary conditions  $\frac{d\Phi_0[0]}{dx_0} = \frac{d\Phi_0[1]}{dx_0} = 0$  and  $\frac{d\Phi_i[0]}{dx_i} = \frac{d\Phi_i[1]}{dx_i} = 0$ , alongside  $\Phi_0[1] = 1$  for unoccupied space and  $\Phi_i[0] = 1$  for microbes [1], enforcing the normalization condition

$$\int_0^1 \Phi_i[x_i] dx_i = 1$$

## References

1. Kumar P, Narayanan S. Solution of Fokker-Planck equation by finite element and finite difference methods for nonlinear systems. *Sadhana*. 2006;31(4):445–461.
